# Supplementary material
Source: Springer Nature journal article supplement (https://www.springermedizin.de/resource/supplementary/12957_2011_936_MOESM3_ESM.pdf/9565814)

## PCI Analysis by Abdominopelvic Region

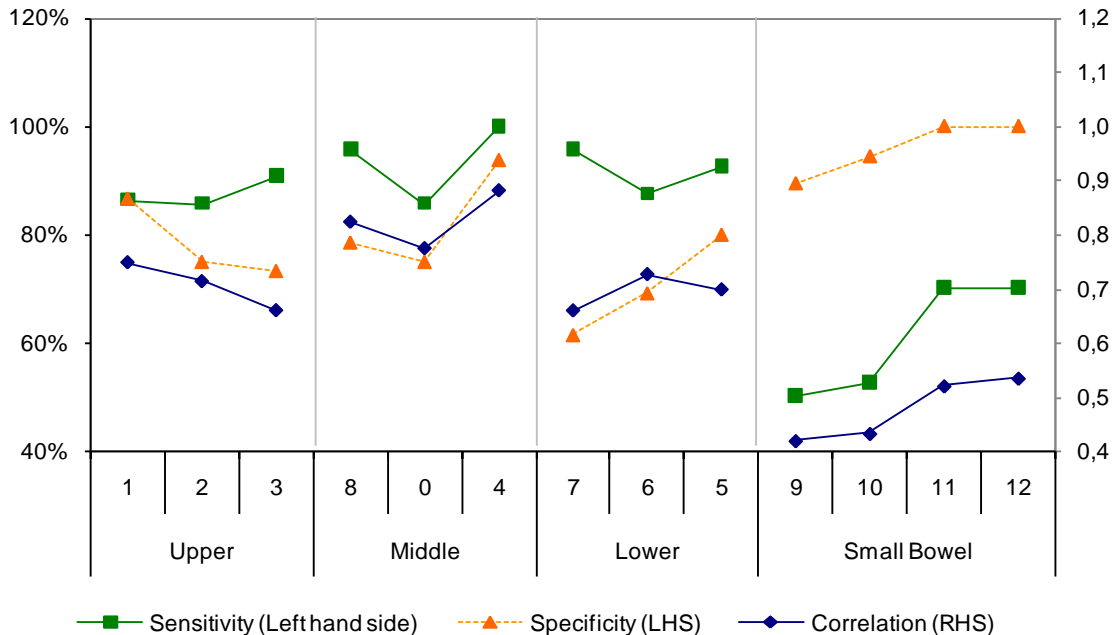

Supplement: MOESM3 [file 9565814]
